1 **Title:** Morphological and functional variability in central and subcentral motor cortex of the  
2 human brain

3

4 **Abbreviated title:** Variability in central and subcentral motor cortex

5

6 **Authors:** Nicole Eichert<sup>1,\*</sup>, Kate E. Watkins<sup>2</sup>, Rogier B. Mars<sup>1,3</sup> & Michael Petrides<sup>4,5</sup>

7

8 <sup>1</sup> Wellcome Centre for Integrative Neuroimaging, Centre for Functional MRI of the Brain  
9 (FMRIB), Nuffield Department of Clinical Neurosciences, John Radcliffe Hospital, University of  
10 Oxford, OX3 9DU, Oxford, United Kingdom

11 <sup>2</sup> Wellcome Centre for Integrative Neuroimaging, Department of Experimental Psychology,  
12 University of Oxford, OX2 6GG, Oxford, United Kingdom

13 <sup>3</sup> Donders Institute for Brain, Cognition and Behaviour, Radboud University Nijmegen, 6525 AJ  
14 Nijmegen, The Netherlands

15 <sup>4</sup> Department of Neurology and Neurosurgery, Montreal Neurological Institute and Hospital,  
16 McGill University, 3801 University Street, Montreal H3A 2B4, QC, Canada

17 <sup>5</sup> Department of Psychology, McGill University, 1205 Dr. Penfield Avenue, Montreal H3A 1B1,  
18 QC, Canada

19

20 \* **Corresponding author:** [nicole.eichert@psy.ox.ac.uk](mailto:nicole.eichert@psy.ox.ac.uk)

21

22 Number of pages: 40

23 Number of figures: 9

24 Number of tables: 3

25 Number of words for abstract: 161

26 Number of words for introduction: 646

27 Number of words for discussion: 1499

28

29 **Conflict of interest:** The authors declare no competing financial interests.

30

31 **Acknowledgments:**

32 N.E. is a Wellcome Trust Doctoral student in Neuroscience at the University of Oxford  
33 [203730/Z/16/Z]. N.E. was supported by a Lazlo and Etelka Kollar Brain@McGill  
34 Graduate/Postgraduate Travel Grant awarded by the Oxford McGill Zürich Partnership in the  
35 Neurosciences. The project was supported by the NIHR Oxford Health Biomedical Research  
36 Centre. The Wellcome Centre for Integrative Neuroimaging is supported by core funding from  
37 the Wellcome Trust [203139/Z/16/Z]. The work of R.B.M. is supported by the Biotechnology  
38 and Biological Sciences Research Council (BBSRC) UK [BB/N019814/1] and the Netherlands  
39 Organization for Scientific Research NWO [452-13-015]. The work of M.P. is supported by CIHR  
40 Foundation Grant FDN-143212.

41 **Abstract**

42

43 There is a long-established link between anatomy and function in the somatomotor system in  
44 the mammalian cerebral cortex. Morphology of the central sulcus predicts the location of  
45 functional activation peaks in individuals, but morphological variation in the subcentral region  
46 and its relationship to functional activation is unknown. Investigating the subcentral region is  
47 particularly important in the context of speech, since control of the larynx during human  
48 speech production activates this region. Here, we examined whether morphological variation  
49 in the central and subcentral region is related to functional activation during movement of the  
50 hand, lips, tongue, and larynx at the individual subject level. We provide a systematic  
51 description of the sulcal pattern of the subcentral and adjacent opercular cortex, including the  
52 inter-individual variability of sulcal morphology. We found a robust relationship between  
53 morphology of the central and subcentral sulcal segments and movement of different  
54 effectors. A surface registration based on sulci revealed that anatomical variability explains, in  
55 part, spatial variability in function.

56

57

58 **Significance Statement**

59 There is a long established relationship between structure and function in the somatomotor  
60 system in the mammalian brain. Here, we show that the location of brain activations during  
61 movement involving different effectors relates to morphological landmarks in the central  
62 sulcus and the subcentral region of the cerebral cortex. We provide a systematic description  
63 of the morphological patterns of the subcentral cortical region and the inter-individual

64 anatomical variability of sulcal segments. We discuss how structural variability can explain  
65 spatial variability in functional activations, which is a critical factor for cross-subject  
66 registrations in group studies.

67

## 68 Introduction

69

70 A fundamental challenge in neuroscience is to establish meaningful links between brain  
71 function and structure. One of the clearest cases of such a structure-to-function relationship  
72 is found in the somatomotor system in the central strip of the cerebral cortex (Jackson, 1863;  
73 Hitzig and Fritsch, 1870; Vogt and Vogt, 1919; Penfield and Boldrey, 1937). Different parts of  
74 the body are represented in an orderly and consistent fashion, following a somatotopic  
75 organization, the schematic visualization of which is known as Penfield's 'homunculus'.

76

77 In contrast to electrical brain mapping studies, neuroimaging studies typically report average  
78 activations from larger groups. This approach demonstrates effects, which are representative  
79 of the human brain in general, but obscures subject-specific features and inter-individual  
80 variability, limiting sensitivity and functional resolution (Bennett and Miller, 2010; Nieto-  
81 Castañón and Fedorenko, 2012; Woo et al., 2014). Thus, a growing number of neuroimaging  
82 studies now tend to report activation patterns in individuals (Miller et al., 2002; Barch et al.,  
83 2013; Carey et al., 2017). A deeper understanding of structure-to-function relationships,  
84 however, requires examination of inter-individual functional variability together with  
85 anatomical variability.

86

87 Several studies have established a coupling between the sulcal/gyral brain anatomy and  
88 functional activation in individuals (e.g., Amiez et al., 2006; Derrfuss et al., 2012; Amiez et al.,  
89 2013; Zlatkina et al., 2016; Bodin et al., 2018). A recent neuroimaging study demonstrated that  
90 individual fMRI activation peaks showed a consistent relationship between the effector being  
91 moved and the morphologically defined segments of the central sulcus (Germann et al., 2019).  
92 The inter-individual variability of the central sulcus segments, however, was not quantified and  
93 this investigation focused exclusively on the central sulcus.

94

95 Movement representation in the human brain, however, is not limited to the central sulcus.  
96 The subcentral gyrus, in addition to the ventral region of the central sensorimotor strip, is  
97 involved in speech-related movements (Penfield and Boldrey, 1937; Olthoff et al., 2008;  
98 Grabski et al., 2012; Bouchard et al., 2013). Voluntary control of laryngeal movements during  
99 vocalization evokes brain activity in two distinct regions in lateral motor cortex: a dorsal region  
100 close to the representation of the lips and a ventral region close to the lateral fissure (reviewed  
101 in: Belyk and Brown, 2017; Eichert et al., 2020a). The representation of the larynx in the human  
102 brain, however, remains controversial and inconsistent reports in the literature might relate to  
103 inter-individual variability. Examining functional anatomy of the speech motor system thus  
104 requires investigation both of the central sulcus and the subcentral gyral region at an individual  
105 subject level.

106

107 There has been no systematic examination of the morphological variability in the subcentral  
108 gyrus and the adjacent opercular cortex. There are two distinct sulci in the subcentral region:  
109 the anterior subcentral sulcus (*asc*s) and the posterior subcentral sulcus (*p*scs) (Petrides, 2012,  
110 2019). The variability of these two sulci in relation to the central sulcus segments across

111 individuals requires examination, as well as the relationship of morphological variability to  
112 functional brain activity during movement.

113

114 Here, we assessed the structure-to-function relationship in the human motor system on an  
115 individual subject level by examining the morphology of the central sulcus, the subcentral gyrus  
116 and the adjacent central operculum. We performed sulcal labelling in surface space, rather  
117 than in volume space, which is a suitable representation of the intrinsic topology of the  
118 cerebral cortex (Fischl et al., 1999). To visualize and quantify inter-individual variability of the  
119 examined sulcal segments, we derived spatial probability maps in both standard surface and  
120 volume space. In a subset of subjects, we acquired fMRI data to localize brain activity during  
121 movement of the hand, lips and tongue, as well as the larynx during vocalization (Eichert et al.,  
122 2020a). To investigate how this structure-to-function relationship can help to improve  
123 alignment of data, we registered all subjects based on the sulcal surface labels. A decrease in  
124 distances across activation peaks after applying the registration indicates that anatomical  
125 variability can explain some of the functional variability.

126

127

## 128 Material and Methods

129

### 130 *Subjects*

131

132 Data from two groups of subjects were used. In one study group, both structural and functional  
133 MRI data were acquired; in the other study group, only structural MRI data were available.

134

135 Structural and functional MRI data from the performance of motor tasks were acquired from  
136 20 subjects (12 females, 18 – 40 years, 5 left-handers). All subjects were self-reported native  
137 English speakers (two were raised bilingually from infancy and three were fluent in a second  
138 acquired language) and had no history or diagnosis of speech disorders. All had normal hearing,  
139 normal or corrected-to-normal vision, and no neurological impairments. The subjects were  
140 part of a study that had been approved by the Central University Research Ethics Committee  
141 of the University of Oxford (CUREC, R55787/RE001) in accordance with the regulatory  
142 standards of the Code of Ethics of the World Medical Association (Declaration of Helsinki). All  
143 subjects gave informed consent for their participation and were monetarily compensated for  
144 their participation.

145

146 In addition, we used cortical brain surface reconstructions from 30 subjects provided by the  
147 Human Connectome Project (HCP), WU-Minn Consortium (Principal Investigators: David Van  
148 Essen and Kamil Ugurbil; 1U54MH091657) funded by the 16 NIH Institutes and Centers that  
149 support the NIH Blueprint for Neuroscience Research; and by the McDonnell Center for  
150 Systems Neuroscience at Washington University (Van Essen et al., 2013). The minimally pre-  
151 processed datasets of the first 31 subjects (16 female, age range 22-35 years) of the Q2 release  
152 were used. One subject was excluded because of a technical problem in the automatic  
153 FreeSurfer parcellation.

154

155

156 *MRI Data Acquisition*

157

158 MRI data acquisition parameters differed for the two groups of subjects. Data from the  
159 subjects that took part in the functional study were obtained at the Oxford Centre for Human  
160 Brain Activity (OHBA) using a 3T Siemens Prisma scanner with a 32-channel head coil. Two  
161 structural images of the whole brain had been acquired at 1 mm isotropic resolution; a T1w  
162 image (MPRAGE sequence) and a T2w image (SPACE sequence). For task-fMRI, whole head  
163 T2\*-weighted echo planar images were acquired at 2.4 mm<sup>3</sup> isotropic resolution (TE = 30 ms,  
164 multiband fact 6, TR = 0.8 s, Casey et al., 2018).

165

166 Data acquisition and preprocessing methods of the HCP subjects are detailed in Glasser et al.  
167 (2013) and Uğurbil et al. (2013). T1w images had been acquired using an MPRAGE sequence  
168 at 0.7 mm isotropic resolution.

169

170

171 *Experimental Design*

172

173 The 20 subjects who provided structural and functional data took part in an fMRI study on  
174 speech production and laryngeal motor control. The experimental design, processing, and fMRI  
175 results of this study have been reported elsewhere in detail and are here only briefly described  
176 (Eichert et al., 2020a). In a functional localizer task, subjects were asked to perform repeated  
177 lip protrusion or tongue retraction at a rate of approximately 1-2 reps/s. The subject's  
178 breathing pattern was explicitly controlled using the fixation symbol on the screen, instructing  
179 them to inhale for 1.5 s and exhale for 4 s. A 'breathing only' condition, during which the  
180 subjects followed the same breathing pattern, was acquired as baseline condition. Each task  
181 condition was performed in blocks lasting 22 s followed by a rest period of 8 s with normal  
182 breathing. The conditions were presented in a fixed pseudo-random order following a  
183 balanced Latin-square design wherein each condition was repeated four times.

184

185 In a separate task, subjects were instructed to produce a syllable sequence (/la lei li la lei li/)  
186 under four different conditions: overt speech, silent mouthing, only vowel production and  
187 covert speech. Breathing instructions, task timing and randomization of the four blocks were  
188 the same as described for the localizer task, except that each condition was repeated five  
189 times. In a third task, subjects performed a phonological and semantic judgement task, which  
190 involved button presses with the right index finger to indicate responses. This task was  
191 analyzed as a localizer for the hand region in the left hemisphere.

192

193

194 *Structural MRI Data Analysis*

195



196 Data of the subjects who took part in the functional study were pre-processed using the HCP-  
197 pipeline Glasser et al. (2013). The automatic processing pipeline includes cortical surface  
198 reconstruction using FreeSurfer based on the contrast from the T1w and the T2w images and  
199 automatic assignment of neuroanatomical labels. Cortical surface reconstructions of the HCP  
200 subjects were derived using FreeSurfer based on the T1w scans and directly provided by the  
201 database. A linear transformation (12 degrees of freedom) from FreeSurfer's anatomical to  
202 standard MNI space (nonlinear 6<sup>th</sup> generation atlas, Fonov et al., 2011) was derived using FSL's  
203 FLIRT (Jenkinson and Smith, 2001; Jenkinson et al., 2002).

204

205

206 *Functional MRI Data Analysis and Statistical Analysis*

207

208 Functional MRI data processing was carried out using FEAT (fMRI Expert Analysis Tool) Version  
209 6.00, part of FSL (FMRIB's Software Library, [www.fmrib.ox.ac.uk/fsl](http://www.fmrib.ox.ac.uk/fsl)) including motion  
210 correction of the images and unwarping using a fieldmap (Jenkinson, 2003). Time-series  
211 statistical analysis was based on a general linear model (GLM) implemented in FILM with local  
212 autocorrelation correction (Woolrich et al., 2001). Standard motion correction parameters and  
213 individual volumes that were motion outliers, determined using `fsl_motion_outliers`, were  
214 included as separate regressors at the first level for each subject. Registration to the high-  
215 resolution structural scan and standard 2-mm MNI template was carried out using FLIRT.  
216 Registration from high resolution structural to MNI space was then further refined using FNIRT  
217 nonlinear registration (Andersson et al., 2007).

218

219 In the functional localizer task for lip and tongue movement, activity during each condition was  
220 assessed relative to the ‘breathing only’ condition. For the syllable production task, the  
221 conditions were analyzed in a factorial model that allowed separation of the (supralaryngeal)  
222 articulation and the (laryngeal) vocalization components of the task. We refer to the latter as  
223 ‘vocalization’ component (index for laryngeal activity during voice production), while other  
224 studies have referred to it as voicing or phonation. Brain activity associated with the control of  
225 supralaryngeal articulation was defined as (‘overt speech’ *minus* ‘vowel production’) *plus*  
226 (‘silent mouthing’ *minus* ‘covert speech’) and the main contrast for vocalization was derived  
227 by the contrast (‘overt speech’ *minus* ‘silent mouthing’) *plus* (‘vowel production’ *minus* ‘covert  
228 speech’). In both tasks described above, the rest blocks with normal breathing served as  
229 baseline, which means that they were not modelled in the GLM. For the hand localizer task,  
230 we derived a contrast of all conditions involving button presses relative to a resting baseline.

231

232

### 233 *Individual Surface Activation Maxima*

234

235 Activation maxima were derived using the steps described in Eichert et al. (2020a), which are  
236 repeated here. To assess intra-individual variability of the fMRI results, we derived the location  
237 of individual activation maxima for hand, lip, and tongue movement, and larynx activity during  
238 vocalization. Activation maxima were derived in both hemispheres in volume space using  
239 anatomically defined ROIs. For hand (left hemisphere only), lip, and tongue movement, we  
240 used the central sulcus as a volumetric ROI to extract the maximum. The ROI was defined using  
241 FreeSurfer’s automatic volumetric labelling based on the Destrieux Atlas.

242

243 For the vocalization contrast from the syllable production task, which indicates laryngeal  
244 activity during voice production, we derived two separate activation maxima: one located in a  
245 dorsal area and one in a ventral area of the central sulcus. To account for additional articulation  
246 of the tongue during the syllable production task, a spherical ROI (7 voxels diameter) around  
247 each individual's maximum voxel from the tongue movement localizer was masked out from  
248 the z-statistics image of the vocalization contrast prior to extracting the maximum.

249

250 For the dorsal larynx ROI, we used a dorsally and ventrally cropped section of the central sulcus  
251 in volume space (coordinates in MNI space:  $z = 50$  to  $z = 30$ ). The ventral larynx ROI was derived  
252 manually based on individual anatomy in surface space to ensure that the ROI did not overlap  
253 with unrelated brain areas such as the subjacent auditory cortex in the temporal lobe or  
254 inferior frontal cortex located anteriorly. A liberal surface ROI was drawn on the individual's  
255 midthickness surface covering the ventral part of the central sulcus and adjacent gyri.  
256 Anteriorly, the ROI was delineated by the inferior portion of the precentral sulcus and  
257 posteriorly the ROI spanned the postcentral gyrus. If present, the lateral portion of the  
258 ascending sulcus in subcentral gyrus was included within the ROI. The dorsal limit of the ROI  
259 was defined by a horizontal line across the gyrus at the level of the usual location of the  
260 posterior ramus of the inferior precentral sulcus. The ventral larynx surface ROI was converted  
261 into a volumetric ROI covering the underlying cortical ribbon using Workbench Command  
262 (`wb_command`, [www.humanconnectome.org/software/connectome-workbench.html](http://www.humanconnectome.org/software/connectome-workbench.html)).

263

264 Individual volumetric ROIs were linearly transformed from FreeSurfer's anatomical to  
265 functional space of the respective task fMRI scan. Within the ROI, the voxel of maximal  
266 intensity was determined from the z-statistics image. The activation maxima were mapped to

267 the individual's native midthickness surface, then smoothed (FWHM = 1 mm) and binarized to  
268 form a small circular patch. To assess spatial variability of the functional activity, all subjects'  
269 activation peaks were resampled to the same regular 32k surface mesh, prior to any  
270 registration.

271

272

### 273 *Sulcal Labelling*

274

275 We identified the following sulci and sulcal segments in the structural data from all 50 subjects:  
276 five segments of the central sulcus from dorsal to ventral (*cs\_1* to *cs\_5*), the lateral and  
277 opercular segments of the anterior subcentral sulcus (*ascs\_lat*, *ascs\_op*) and the posterior  
278 subcentral sulcus (*pscs*). Sulcal labels for one example subject are shown in Figure 1. Sulcal  
279 labels were drawn manually onto the native surface mesh (approximately 136,000 vertices) in  
280 Connectome Workbench's `wb_view` ([www.humanconnectome.org/software/connectome-](http://www.humanconnectome.org/software/connectome-workbench.html)  
281 [workbench.html](http://www.humanconnectome.org/software/connectome-workbench.html)). Surface features of both pial and white matter surface were inspected in  
282 conjunction with the subject's T1w scan. The identification of central sulcus segments was  
283 based on changes in direction of the sulcus and on gyral 'plis de passage', which are small gyral  
284 bridges connecting the postcentral with the precentral gyrus. These gyral bridges can be most  
285 easily identified on the white matter surface (Germann et al., 2019).

286

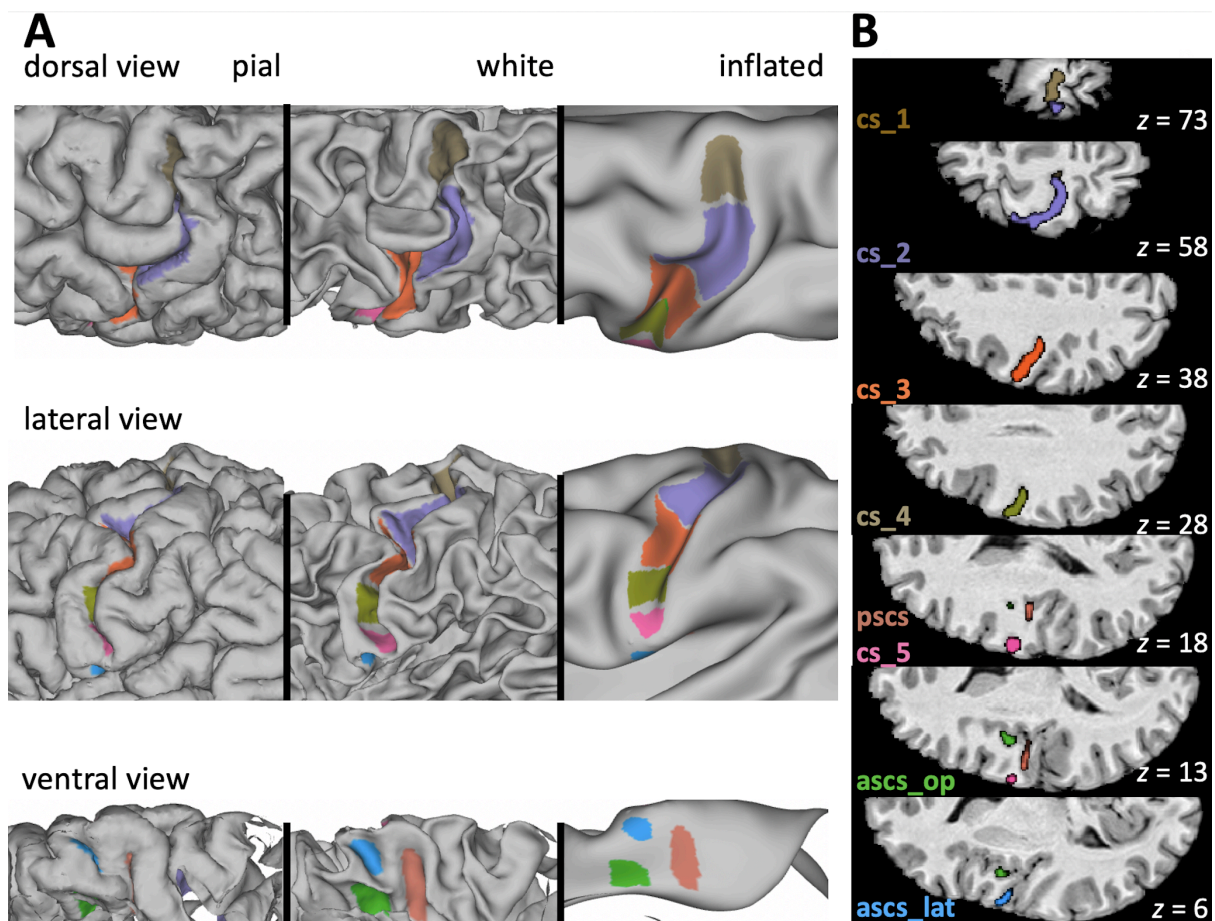

287

288 Figure 1: Sulcal labelling. **A:** Sulcal labels in one individual displayed onto the native pial surface, white  
 289 matter surface, and inflated surface. **B:** Sulcal labels of the same subject in MNI volume space.

290

291 *Cs\_1* is the most dorsal segment of the central sulcus, which runs more or less in a vertical  
 292 straight direction. Its ventral boundary was drawn at the location where a gyral bridge forms a  
 293 prominent landmark on the posterior bank of the central sulcus. *Cs\_2* has a characteristic  
 294 curvature in the shape of the Greek omega letter (see Figure 1B), which is known as the ‘hand  
 295 knob’ (Yousry et al., 1997). This knob is often more pronounced in the left hemisphere and it  
 296 can comprise two smaller knob-like curves instead of one. The boundary between *cs\_2* and  
 297 *cs\_3* was drawn at the location where the central sulcus changes direction and where a gyral  
 298 passage can be observed on the posterior bank. In some subjects, an additional convexity of

299 the central sulcus can be observed on the posterior bank in the middle of *cs\_3*. The ventral  
300 boundary of *cs\_3* was drawn ventral to this convexity, at the location where a small gyral bridge  
301 forms a landmark on the anterior bank of the central sulcus. The last two segments of the  
302 central sulcus, *cs\_4* and *cs\_5* are smaller in extent, shallower and more variable in their  
303 morphology. The boundary between *cs\_4* and *cs\_5* was defined based on a gyral bridge on the  
304 posterior bank of the central sulcus. *Cs\_5* is the most ventral part of the central sulcus, which  
305 can form an additional curve or run in straight direction.

306

307 The labels for *asc*s and *p**sc*s were assigned based on an atlas of human brain morphology  
308 (Petrides, 2019). For *asc*s, we labelled two distinct segments: a lateral and an opercular  
309 segment (*asc*s\_*lat*, *asc*s\_*op*). The course of *asc*s\_*lat*, *asc*s\_*op* and *p**sc*s was found to be highly  
310 variable and a detailed description of the sulcal anatomy in the subcentral region is reported  
311 in the results section.

312

313 The morphological patterns of the ventral subcentral region were categorized into five types  
314 depending on the configuration of *asc*s\_*lat*. The classification was based on the location of  
315 *asc*s\_*lat* on the cortex and its spatial relation to other sulci. Sulcal segments were considered  
316 as ‘merged’, when there was a clear continuation on the pial surface, although, in some cases,  
317 a discontinuity between the merged sulci was still observed on the white matter surface.

318

319

320 *Spatial Probability Maps*

321

322 In order to characterize the inter-individual morphological variability of the labelled sulci, we  
323 generated probability maps in surface and volume space. To obtain surface probability maps,  
324 all surface labels were resampled from native to a common regular 164k mesh. At each vertex,  
325 the 50 binary surface maps were summed and then normalized to create a surface label with  
326 intensities ranging from 0 % to 100 % at the maximal possible overlap of all 50 subjects. For  
327 visualization, the surface probability maps were displayed onto the average of all subjects'  
328 inflated surfaces.

329

330 For the generation of volumetric probability maps, we first deformed the subjects' native pial  
331 surface to MNI space by applying a linear transformation (12 degrees of freedom). Then we  
332 mapped the surface labels from the pial surface to 0.5 mm resolution volume space using  
333 `wb_command`. The individual volumetric labels were smoothed (Gaussian kernel with FWHM  
334 of 2 mm), thresholded at 0.1, binarized and then summed at each voxel. For visualization,  
335 volume probability maps were overlaid onto the 0.5 mm MNI average brain.

336

### 337 *Structure-to-Function Relationship*

338

339 Next, we examined the spatial relationship between the sulcal segments and the task  
340 activation peaks at the individual subject level. This analysis was performed in the 20 subjects  
341 who contributed both task and structural data. Individual task activation peaks were mapped  
342 onto the individual's cortical surface as described above for sulcal segments. As Extended Data  
343 (Figure 6-1), we show sulcal labels and activation peaks for all subjects, which allows an  
344 assessment of the spatial relationships at the individual subject level.

345

346 In order to characterize the structure-to-function relationship at the group level, we aligned all  
347 individual surfaces based on the anatomical surface labels and then we applied the same  
348 registration to individual task activation peaks. This approach allowed us to visualize individual  
349 variability in the spatial distribution of task activation peaks in a common group-level space.

350

351 The registration of sulcal labels was driven by the binary labels for *cs\_1*, *cs\_2*, *cs\_3*, *cs\_4*, *cs\_5*,  
352 *ascs\_lat*, *ascs\_op* and *pscs* and performed using multimodal surface matching (MSM, Robinson  
353 et al. (2014)). As target, or reference, for the MSM-based registration, we used the normalized  
354 and thresholded (> 0.4) average labels after projecting all of them to the same regular sphere  
355 (approximately 32,000 vertices). Each subject's sulcal maps and the reference sulcal maps  
356 were merged into a combined file with six data arrays. Then, we derived a registration using  
357 MSM for each subject. We refer to the average of the transformed labels resulting from the  
358 MSM registration as 'group-level segments'.

359

360 To characterize the structure-to-function relationship, we quantified the effect of the  
361 registration on the spatial variability of the activation peaks. The spatial variability of peaks in  
362 each task cluster before and after applying the registration was quantified by computing the  
363 median geodesic distances across all 20 activation peaks for each effector on a regular sphere.  
364 We compared this measure to a baseline measure of spatial variability prior to any anatomical  
365 registration, where the functional peaks were resampled to a common sphere. We also derived  
366 two additional anatomical registrations using the same steps as described above: one using  
367 the identical parameters, but based on four FreeSurfer labels (precentral gyrus, central sulcus,  
368 postcentral gyrus, subcentral gyrus/sulcus) and one based on sulcal depth whole-brain maps



369 using MSM default settings. FreeSurfer labels and sulcal depth maps were provided by the  
370 HCP-processing pipeline.

371

372

## 373 Results

374

### 375 *Sulcal Pattern of the Subcentral Region*

376

377 The sulcal anatomy of the subcentral region was examined in a total of 100 hemispheres ( $n =$   
378 50 brains) and the morphological patterns encountered were classified into five types (Figure  
379 3). The most commonly observed configuration of subcentral sulci (Type 1, 44 % of  
380 hemispheres) is shown in Figure 2. The example in Figure 1 also shows an individual  
381 hemisphere classified as Type 1. In the Type 1 configuration, the central sulcus does not extend  
382 ventrally to meet the lateral fissure. The fifth and most ventral segment of the central sulcus  
383 (*cs\_5*) is typically short and forms a curve in an anterior direction. The lateral segment of *asc*s  
384 (*asc*s\_*lat*) is visible on the lateral surface of the brain and is clearly separate from the central  
385 sulcus. Dorsally, the *asc*s\_*lat* extends into the precentral gyrus with variable length. Ventrally,  
386 the *asc*s\_*lat* continues into the opercular cortex, which is hidden within the lateral fissure of  
387 the brain. A small gyral bridge separates the *asc*s\_*lat* from the opercular segment of *asc*s  
388 (*asc*s\_*op*), which continues medially until it reaches the circular insular sulcus (*cris*). The medial  
389 origin of the *asc*s\_*op* can be identified at a curve of *cris*, which is formed by the posterior short  
390 insular gyrus just anterior to the central insular sulcus (*cis*). Posterior to *asc*s\_*op*, the posterior  
391 subcentral gyrus (*p*scs) can be found, which extends laterally towards the lateral fissure. The

392 medial origin of *pscs* can be identified at a curve of *cris* posterior to *cis*, which is formed by the  
393 anterior long insular gyrus. The number of curvatures of *cris* and the number of subcentral  
394 sulci is variable, but the *ascs\_op* and the *pscs* could be reliably identified in every subject  
395 examined. The morphology of all of the mentioned sulci is variable across subjects, but the  
396 description of morphological sub-types below focusses on the configuration of the *ascs\_lat*.  
397

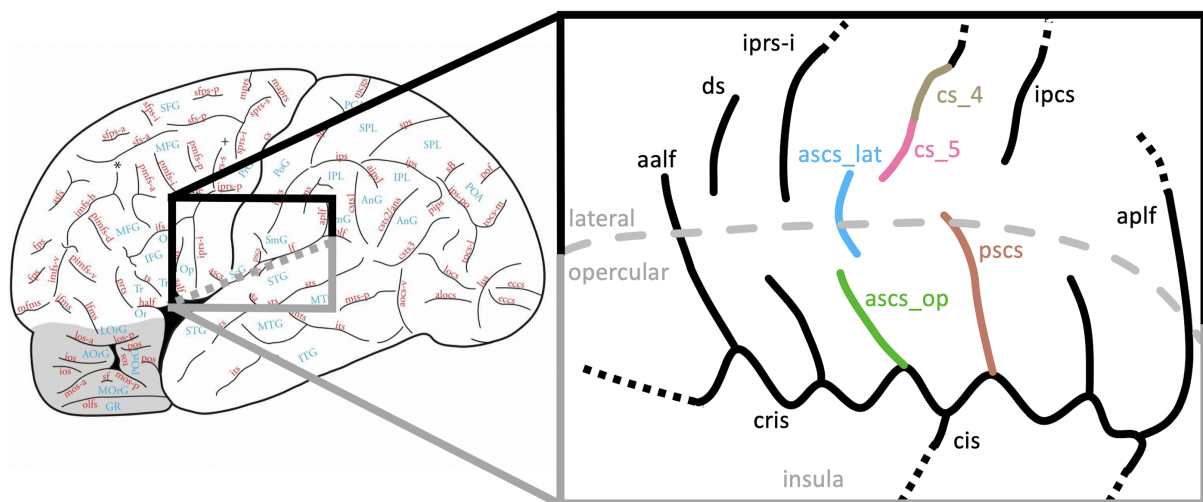

398  
399 Figure 2: Sulcal pattern of the subcentral region. **Left:** Sulcal map of the human cerebral cortex  
400 (Petrides, 2012). **Right:** Type 1 configuration of sulci in the subcentral region. Anatomical variability was  
401 assessed in the sulci marked with colour: *ascs\_lat*, lateral segment of the anterior subcentral sulcus;  
402 *ascs\_op*, opercular segment of the anterior subcentral sulcus; *cs\_1* to 5, segments of the central sulcus  
403 (only *cs\_4* and *cs\_5* are shown in the highlighted region); *pscs*, posterior subcentral sulcus. Grey dashed  
404 line: visible surface boundary between lateral and opercular cortex. *aalf*, ascending anterior ramus of  
405 the lateral fissure; *aplf*, ascending posterior ramus of the lateral fissure; *cis*, central insular sulcus; *cris*,  
406 circular insular sulcus; *ds*, diagonal sulcus; *iprs*, inferior precentral sulcus.

407

408

409 *Different Types of Morphological Patterns*

410

411 The subcentral region exhibits high inter-individual variability regarding the configuration of  
412 the *ascs\_lat*. The observed occurrences of morphological types are reported in Table 1. In  
413 addition to the canonical (Type 1, 44 % of hemispheres) configuration described above, it was  
414 commonly observed that the *ascs\_lat* merged with the central sulcus (Type 2, 20 %) (Figure 2).  
415 In these cases, the *ascs\_lat* remains mostly on the lateral brain surface and does not reach into  
416 the opercular cortex. The *ascs\_op* extends further lateral and its extension is visible on the  
417 lateral brain surface. Another commonly observed sub-type was identified by a more opercular  
418 position of the *ascs\_lat* (Type 3, 18 %). In Type 3, the *ascs\_lat* is less visible on the lateral  
419 surface and the central sulcus extends further ventral towards the lateral fissure. Type 3 is also  
420 characterized by a reduced gyral bridge separating the *ascs\_lat* from the *ascs\_op*. In six cases,  
421 the opercular continuation of the the *ascs\_lat* curved posteriorly and merged with *pscs* instead  
422 of the *ascs\_op* (not shown as separate type). In several cases, we also observed the *ascs\_lat*  
423 to merge with the inferior ramus of the inferior precentral sulcus (*iprs-i*) (Type 4). When  
424 *ascs\_lat* and *iprs-i* merge, the ventral continuation of *ascs\_lat* curves in an anterior rather than  
425 a posterior direction and the position of *ascs\_lat* is more lateral than opercular. In a few cases  
426 (Type 5) the position of the *ascs\_lat* was notably further rostral so that it was positioned  
427 anterior to *ascs\_op* rather than posterior as in the other configurations.

428

429 Strong hemispheric differences were observed in the occurrences of the morphological types  
430 (Table 1). Type 2 (*ascs\_lat* merged with *cs\_5*) is much more common in left hemispheres (85  
431 % vs. 15 %), while Type 4 (*ascs\_lat* merged with *iprs*) and Type 5 (*ascs\_lat* further anterior),  
432 are more common in right hemispheres (75 % vs. 25 % for Type 4; 83 % vs. 17 % for Type 5),  
433 although both types are infrequent. For Type 1 (canonical configuration) and Type 3 (*ascs\_lat*  
434 merged with *ascs\_op*) no pronounced hemispheric differences were observed.

435

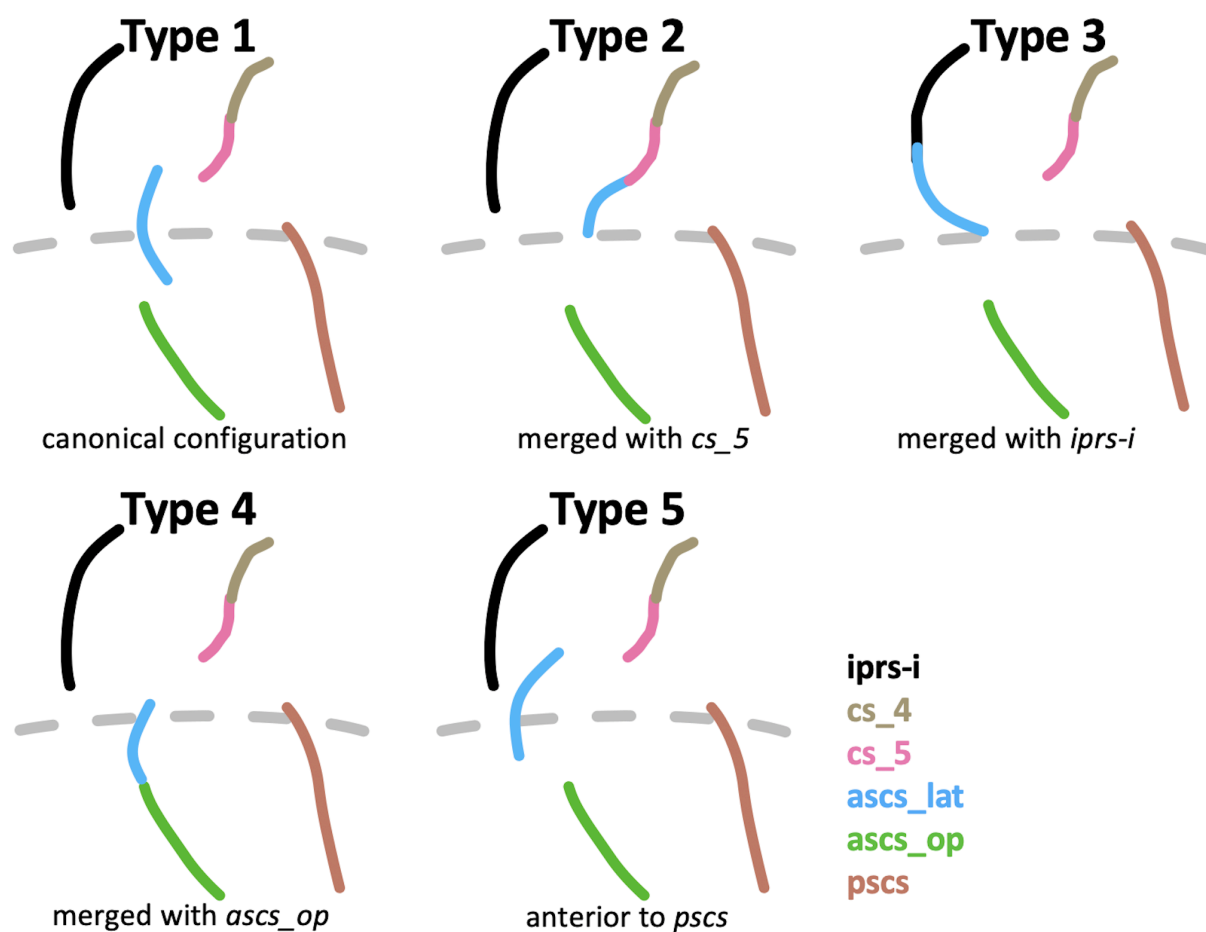

436

437 Figure 3: Morphological patterns. Schematic drawings illustrating the main morphological patterns of  
 438 the subcentral region formed by the *ascs\_lat* with neighbouring sulci. Type 1: Canonical configuration  
 439 observed in the majority of hemispheres (also shown in Figure 2). Type 2: *ascs\_lat* merged with the  
 440 central sulcus. Type 3: *ascs\_lat* merged with *ascs\_op*. Type 4: *ascs\_lat* merged with the inferior ramus  
 441 of *iprs*. Type 5: *ascs\_lat* anterior to *ascs\_op*.

442

443 Table 1: Morphological patterns. Observed frequencies of morphological patterns based on 100  
 444 examined hemispheres (LH – left hemisphere; RH – right hemisphere).

|    | Type 1 | Type 2 | Type 3 | Type 4 | Type 5 |
|----|--------|--------|--------|--------|--------|
| LH | 20     | 17     | 9      | 3      | 1      |

|       |    |    |    |    |   |
|-------|----|----|----|----|---|
| RH    | 24 | 3  | 9  | 9  | 5 |
| Total | 44 | 20 | 18 | 12 | 6 |

445

446

447 *Spatial Probability Maps*

448

449 The morphological variability of the central sulcus segments and the subcentral sulci was  
450 quantified and visualized using spatial probability maps in 2D surface space and 3D volumetric  
451 space (Figure 4, Figure 5). For both surface and volume probability maps, intensity values  
452 decrease from the center of the map towards the edges, which is typical for overlap maps.  
453 Maximal and median values of the probability maps are reported as Extended Data (Figure 4-  
454 1). Values in the volumetric probability maps are overall lower given that they capture  
455 variability in three spatial dimensions. The pattern of values across sulci and hemispheres,  
456 however, is consistent across surface and volumetric probability maps. For all sulci,  
457 hemispheric differences were observed with regard to the location in volume space (Figure 5).  
458 All sulcal segments in the left hemisphere are located consistently further posterior compared  
459 to the segments on the right hemisphere, which is in line with the Yakovlevian anticlockwise  
460 torque of the two hemispheres (see Table 2 for coordinates of the voxel of maximal probability  
461 and for the center of gravity for each label).

462

463 The first three segments of the central sulcus (*cs\_1 - 3*) show high inter-individual spatial  
464 consistency, which is characterized by high values, i.e. overlap, in the probability maps.  
465 Consistency is lower for *cs\_4* and *cs\_5*. Consistency is also low for the subcentral sulci (*ascs\_lat*,  
466 *ascs\_op*, *pacs*) with lowest consistency for *ascs\_lat*, especially in the left hemisphere. The

467 hemispheric effect for the *ascs\_lat* is evident in both surface and volumetric probability maps.  
468 It was observed that the *ascs\_lat* is larger in extent and deeper in the right hemisphere (see  
469 for example Figure 5, slice  $y = -1$ ). The low consistency in *ascs\_lat* is in line with the variable  
470 morphological subtypes that were described above. The two subcentral sulci, *ascs\_op* and  
471 *pscs*, are less consistent than the central sulcus segments, but more consistent than the  
472 *ascs\_lat*. *Ascs\_op* and *cs\_5* show a tendency for more variability in the right hemisphere, which  
473 is the opposite pattern of lateralization in comparison with that for the *ascs\_lat*.  
474

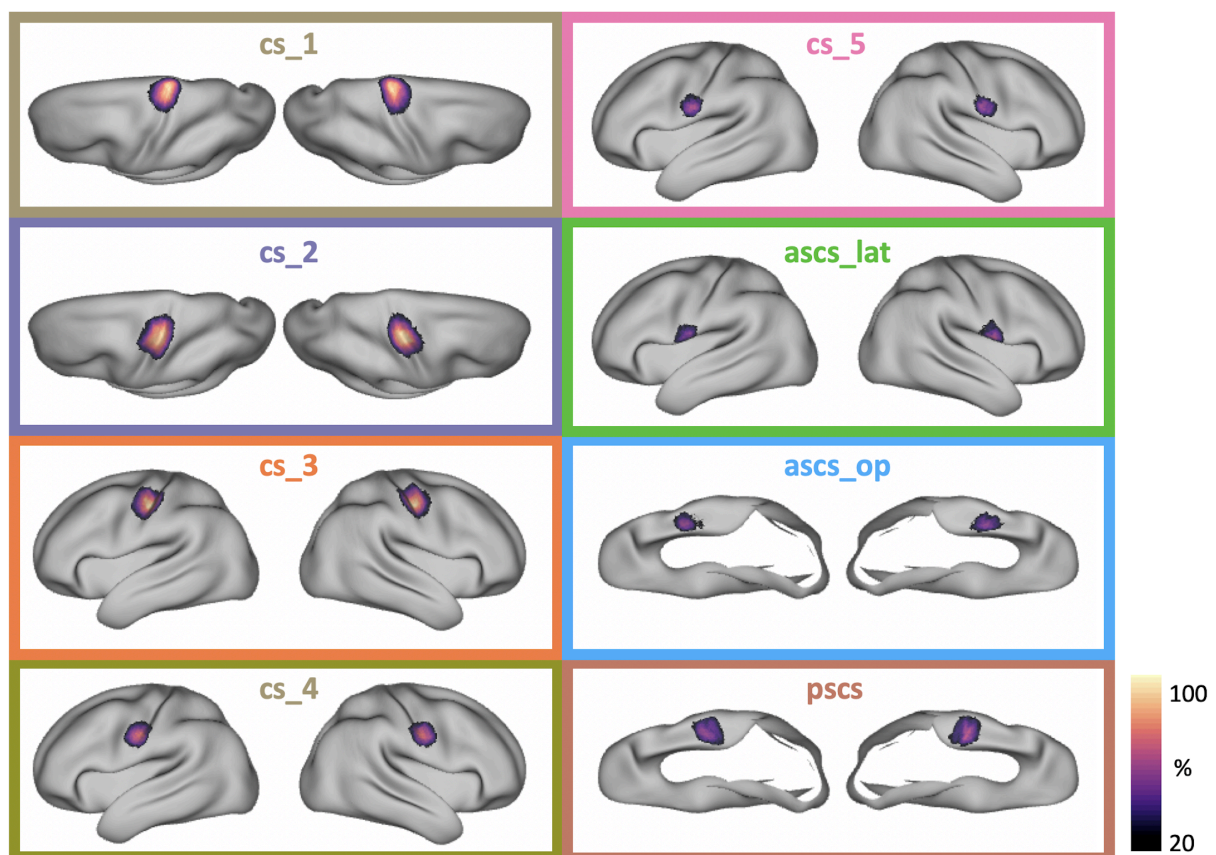

475  
476 Figure 4: Surface probability maps. Probability maps of central and subcentral sulcal labels shown on  
477 an inflated average surface ( $n = 50$ ). Labels for *cs\_1* and *cs\_2* are shown from a dorsal perspective.  
478 Labels for *ascs\_op* and *pscs* are shown from a ventral perspective with the temporal lobe removed for  
479 better visibility of the opercular cortex. Intensity values show the amount of overlap with 100 %  
480 indicating an overlap in all subjects.

481

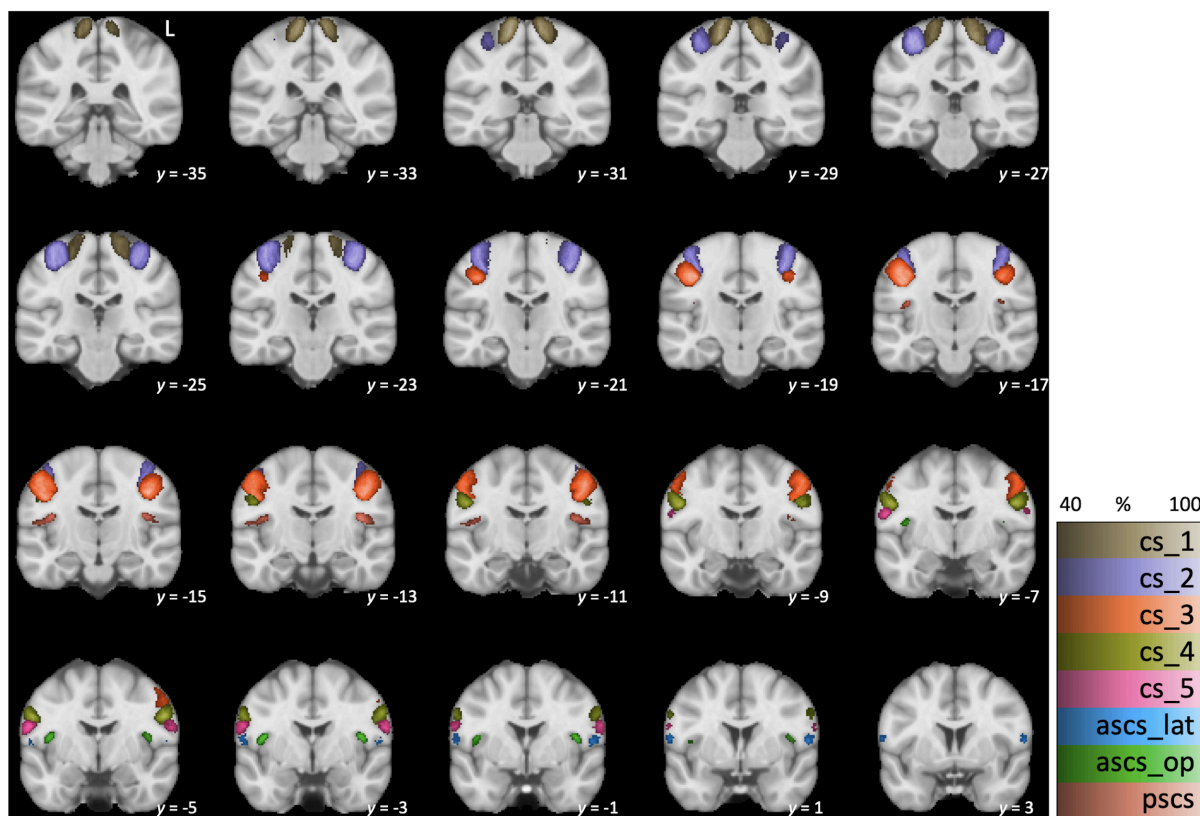

482

483 Figure 5: Volumetric probability maps. Probability maps generated after linear registration to MNI space  
 484 overlaid onto the standard MNI template ( $n = 50$ ). L – left hemisphere shown on right side of the image.  
 485 Intensity values show the amount of overlap across subjects. Color maps for the different sulci have  
 486 been matched in luminance so that darker colors indicate a lower overlap.

487

488

489 Table 2: Coordinates of probability maps. MNI-coordinates ( $x, y, z$ ) of each sulcal segment's maximal  
 490 voxel and the center of gravity in the volumetric probability maps.

|      | sulcus | maximum |     |    | center of gravity |     |     |
|------|--------|---------|-----|----|-------------------|-----|-----|
|      |        | x       | y   | z  | x                 | y   | z   |
| left | cs_1   | -14     | -30 | 69 | -17               | -30 | -69 |

|       |                 |     |     |    |     |     |    |
|-------|-----------------|-----|-----|----|-----|-----|----|
|       | <i>cs_2</i>     | -36 | -26 | 58 | -36 | -24 | 59 |
|       | <i>cs_3</i>     | -38 | -18 | 42 | -47 | -15 | 46 |
|       | <i>cs_4</i>     | -54 | -8  | 30 | -55 | -7  | 32 |
|       | <i>cs_5</i>     | -58 | -6  | 22 | -60 | -4  | 22 |
|       | <i>ascs_lat</i> | -60 | 2   | 12 | -58 | 0   | 12 |
|       | <i>ascs_op</i>  | -41 | -4  | 14 | -44 | -3  | 10 |
|       | <i>pscs</i>     | -39 | -16 | 18 | -48 | -14 | 15 |
| right | <i>cs_1</i>     | 16  | -28 | 68 | 18  | -28 | 69 |
|       | <i>cs_2</i>     | 38  | -23 | 60 | 36  | -21 | 58 |
|       | <i>cs_3</i>     | 44  | -14 | 40 | 48  | -12 | 46 |
|       | <i>cs_4</i>     | 58  | -4  | 32 | 56  | -5  | 32 |
|       | <i>cs_5</i>     | 62  | -2  | 21 | 62  | -2  | 22 |
|       | <i>ascs_lat</i> | 58  | 1   | 10 | 58  | 2   | 12 |
|       | <i>ascs_op</i>  | 42  | -3  | 14 | 44  | -2  | 11 |
|       | <i>pscs</i>     | 41  | -14 | 18 | 48  | -13 | 16 |

491

#### 492 *Sulcal Registration and Structure-to-Function Relationship*

493

494 We registered all individual surfaces based on the binary sulcal labels using MSM. We then  
 495 applied the registration to individual surface activation peaks from movement of different  
 496 effectors. By these means, we could visualize and assess the spatial relationship of functional  
 497 peaks to the sulcal labels at the group level. After registering the sulcal labels, we averaged all  
 498 transformed sulcal labels and thresholded ( $t > 0.4$ ) the average labels to obtain the outlines of



499 group-level sulcal segments. Figure 6A shows the outlines of thresholded group-level sulci,  
500 which demonstrates an orderly dorsal-ventral configuration of the sulcal segments.

501

502 Next, we applied the registration that was used to transform individual surface labels to the  
503 group space to the functional activation peaks of different effectors in individual subjects.

504 Figure 6B-F shows the location of the resampled activation maxima in relation to the outlines  
505 of the group-level sulcal segments. Given that the same registration was applied to individual  
506 sulcal labels and the peaks, the location of resampled peaks with respect to the group-level  
507 sulci reflects the original spatial relationship on the native surfaces of the individuals.

508

509 Overall, a strong correspondence between sulcal labels and functional peaks was observed.

510 The observed relationships between labels and peaks are reported in Table 3. The majority of  
511 activation peaks from the hand localizer fall inside the center of *cs\_2*. The dorsal peaks for

512 larynx activity are found on the anterior bank of *cs\_3*. Peaks from the lip localizer also fall within

513 *cs\_3* and overlap with the location of the dorsal larynx peaks. Those for the lip, however, are

514 reliably located at the more ventral extent of *cs\_3* whereas those for the dorsal larynx peaks

515 span the segment. Activation peaks from the tongue localizer fall inside *cs\_4* with high

516 consistency. The ventral peaks for larynx activity are associated with *cs\_5* and *ascs\_lat* or with

517 the gyrus in between, but the relationship is less reliable than for the other functional peaks.

518

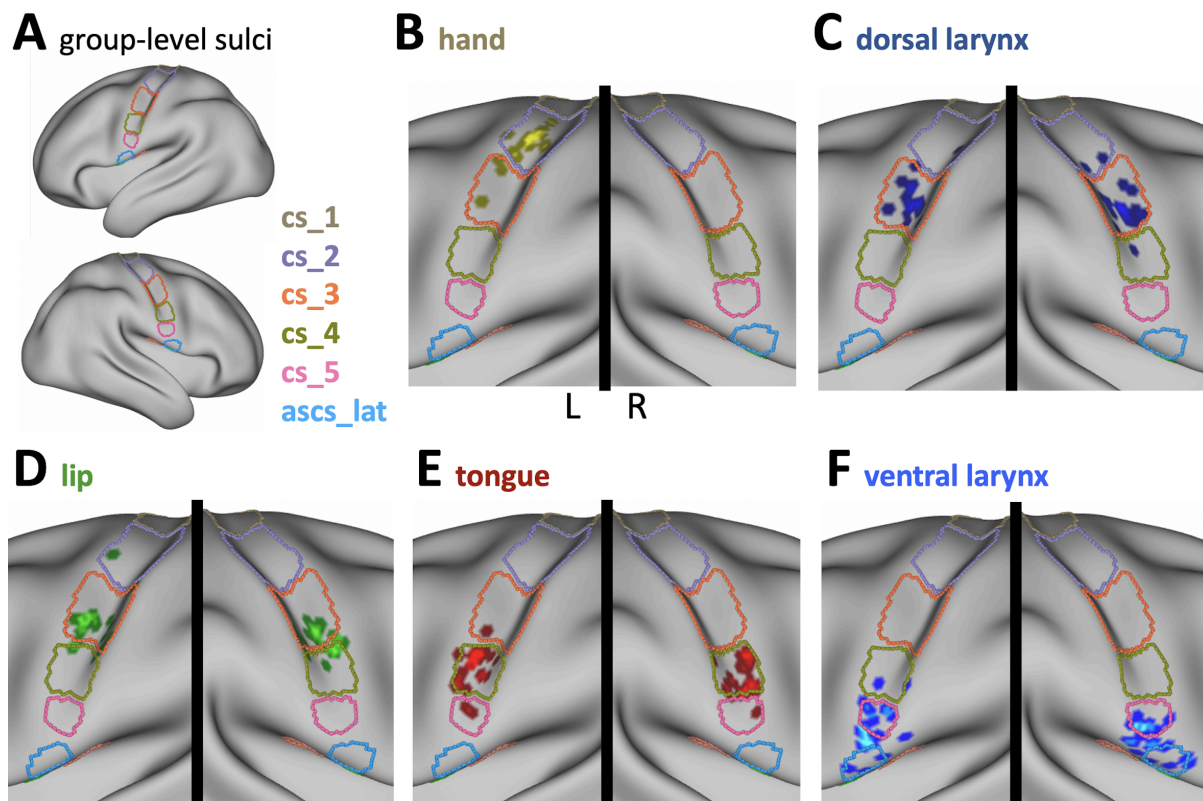

519

520 Figure 6: Structure-to-function relationships. **A**: Outlines of the averaged, normalized and thresholded  
 521 (> 0.4) sulcal maps after registration using MSM (i.e. the group-level sulci). **B-F**: Location of individual  
 522 activation peaks with respect to the sulcal maps after applying the sulcal registration ( $n = 20$ ). Brighter  
 523 colors indicate overlapping peaks. Only the central strip of the brain is shown.

524

525 Table 3: Structure-to-function relationships. Observed relationships between functional activation  
 526 peaks and sulcal labels based on 40 examined hemispheres. The number of peaks for each effector are  
 527 given for each sulcal segment.

|                | <i>cs_1</i> | <i>cs_2</i> | <i>cs_3</i> | <i>cs_4</i> | <i>cs_5</i> | <i>ascs_lat</i> |
|----------------|-------------|-------------|-------------|-------------|-------------|-----------------|
| hand (only LH) | 0           | 16          | 4           | 0           | 0           | 0               |
| dorsal larynx  | 0           | 2           | 37          | 1           | 0           | 0               |
| lip            | 0           | 1           | 34          | 5           | 0           | 0               |
| tongue         | 0           | 0           | 1           | 36          | 3           | 0               |

|                |   |   |   |   |    |    |
|----------------|---|---|---|---|----|----|
| ventral larynx | 0 | 0 | 0 | 2 | 24 | 14 |
|----------------|---|---|---|---|----|----|

528

529

530 To characterize the effect of the sulcal registration on the spatial variability of functional peaks,  
531 we computed the median distance between all peaks for each effector before and after  
532 applying the sulcal transformation, which is shown in the Extended Data (Figure 6-2). Spatial  
533 variability decreased by 11 %, but not to the same extent for all effectors. Clusters in the left  
534 hemisphere benefitted more from the registration, but an exception is the left lip cluster,  
535 where values increased due to an outlier (see Figure 6D). A comparison with a registration  
536 based on FreeSurfer's automatic labels and by sulcal depth demonstrated that all three  
537 anatomical registrations decrease spatial variability when compared to baseline. Performance  
538 of the three registrations is similar across all effectors, but spatial variability of the left ventral  
539 larynx cluster decreased most using the sulcal label registration. Taken together, this  
540 quantification indicates that a registration based on anatomical information decreases the  
541 spatial variability of functional activation peaks. At the given sample size, however, the  
542 reported differences do not reach statistical significance.

543

544

## 545 Discussion

546

547 We examined the morphological patterns and the inter-individual variability of the sulci in the  
548 subcentral region of the cerebral cortex in the human brain and their relation to motor activity.

549 A robust relationship between morphological features of central and subcentral sulcal

550 segments and movement of different effectors at the individual subject level was  
551 demonstrated. Cross-subject registration based on the individually drawn sulcal labels showed  
552 that morphological variability explains functional variability in part.

553

554

### 555 *Morphology of the Subcentral Cortex and the Central Operculum*

556

557 The present study provided a systematic examination of the sulcal patterns of the subcentral  
558 and adjacent opercular cortical region in the human brain, including inter-individual variability  
559 of the sulcal morphology. In this region, one encounters an anterior and a posterior subcentral  
560 sulcus (*ascs*, *pscs*) (Petrides, 2012, 2019). We showed that, in the majority of subjects, the *ascs*  
561 consists of a distinct lateral (*ascs\_lat*) and a distinct opercular segment (*ascs\_op*).

562

563 The morphological patterns of the subcentral region were classified into five distinct subtypes,  
564 based on the configuration of *ascs\_lat*. In addition to the canonical configuration (Type 1,  
565 Figure 2), the *ascs\_lat* often merged with the central sulcus, so that the central sulcus complex  
566 extended further ventral towards the lateral fissure (Type 2). In Type 3, the *ascs\_lat* merges  
567 with the inferior precentral sulcus (*iprs*). In Type 4, the position of the *ascs\_lat* is notably more  
568 opercular and it merges with the *ascs\_op*, so that the *ascs\_lat* and *ascs\_op* form one  
569 continuous sulcus. Type 5 is characterized by a more anterior position of the *ascs\_lat*,  
570 compared with its position in the other types. The variability in the configuration of the lateral  
571 and opercular segments explains why the *ascs* appears as one continuous sulcus in a  
572 volumetric average of structural brain images in MNI space (Petrides, 2019).

573

574

575 *Sulcal Labelling in Surface Space*

576

577 We labelled sulcal segments directly on the subject's native cortical surface, rather than in  
578 volume space as traditionally done in several MRI-based labelling studies (Germann et al.,  
579 2005, 2019; Zlatkina and Petrides, 2010; Amiez et al., 2013; Sprung-Much and Petrides, 2018,  
580 2019). Surface space provides a parsimonious representation of the sheet-like geometry of the  
581 cerebral cortex. We reproduced the segmentation of the central sulcus, as described in a  
582 volumetric labeling study (Germann et al., 2019). The underlying morphological features are  
583 easily visualized in surface space and the labelling is reproducible. Furthermore, using surface  
584 labels allowed us to perform a surface-based registration, where distances are represented as  
585 geodesic distances along the cortex rather than as Euclidean distances between voxels (Fischl  
586 et al., 1999; Klein et al., 2010). In the current study, the labels were drawn manually, but future  
587 research could develop automatic classification of sulcal segments based on supervised  
588 learning algorithms (Clouchoux et al., 2006; Takerkart et al., 2015).

589

590

591 *Spatial Probability Maps*

592

593 We visualized the morphological variability and spatial extent of the central sulcus segments  
594 and the subcentral sulci in surface and volumetric probability maps. The first three central  
595 sulcus segments show the highest spatial consistency across subjects. Consistency decreases  
596 for the fourth and even further for the most ventral (fifth) segment of the central sulcus, which  
597 is in line with previous observations (Germann et al., 2019). The decrease in probability values

598 for *cs\_4* and *cs\_5* can also be attributed to their smaller spatial extent compared to the sulcal  
599 labels for *cs\_1-3*. Consistency for the subcentral sulci *ascslat*, *asclop* and *pscs* is also notably  
600 reduced, which is in line with the inter-subject variability in the morphological patterns as  
601 described above.

602

603

#### 604 *Hemispheric Differences*

605

606 The classification of morphological subtypes and the spatial probability maps revealed  
607 hemispheric differences in the subcentral cortex, indicating that the position of the *ascslat*  
608 along the rostro-caudal axis differs between hemispheres, but the dorso-ventral position does  
609 not. The *ascslat* in the left hemisphere tends to be located further posterior, which frequently  
610 results in a merge with the central sulcus, while the *ascslat* in the right hemisphere is located  
611 more anteriorly. The inter-individual variability as characterized in the spatial probability maps  
612 showed that the *ascslat* is less variable and larger in extent in the right hemisphere.

613

614 These hemispheric differences can be interpreted in relation to sulcal variability of the ventro-  
615 lateral cortex (Germann et al., 2005; Sprung-Much and Petrides, 2018, 2019). Language  
616 processing is lateralized to the left hemisphere and the role of left inferior frontal cortex in  
617 language function is widely established (Broca, 1861; Price, 2000; Vigneau et al., 2006; Hickok  
618 et al., 2016). Functional language lateralization is associated with structural asymmetries  
619 (Foundas et al., 1996; Josse and Tzourio-Mazoyer, 2004) and increased regional variability  
620 (Croxson et al., 2018), but the structure-to-function relationships remain controversial  
621 (Dorsaint-Pierre et al., 2006; Sprung-Much and Petrides, 2018). We presume that increased

622 surface area in the left inferior frontal cortex affects the neighboring sulci so that the *ascs\_lat*  
623 is ‘pushed’ to a relatively further posterior position in the left hemisphere. Despite the  
624 hemispheric differences in morphology, the structure-to-function relationships for basic  
625 movements of different effectors described below, did not exhibit notable differences  
626 between hemispheres.

627

628

### 629 *Functional Activation Peaks and Morphology*

630

631 Here we demonstrated a tight link between individual morphological features of the cortex  
632 and activation peaks for the different effectors examined. We replicated the relationships  
633 between central sulcus segments and functional localizers for the hand, lip, tongue, and larynx  
634 described in Germann et al. (2019). The functional localizer for larynx activity in the current  
635 study differed substantially from the one used by Germann et al., where ‘humming’ was the  
636 task instruction. Furthermore, we identified two larynx peaks in each subject, because more  
637 recent studies suggest that two separate regions in the central motor strip correlate with larynx  
638 activity (Belyk and Brown, 2017; Jarvis, 2019; Eichert et al., 2020a). The ventral ‘humming’ peak  
639 in Germann et al. was associated with the fifth segment of the central sulcus. The current  
640 analysis, however, showed that the ventral larynx peak was also localized in the *ascs\_lat* in a  
641 large portion of subjects. The difference across studies might be due to the significantly larger  
642 sample size in the current study, which allowed a more robust assessment of the relationships.  
643

644 It should be noted that the functional contribution of both larynx regions in motor control  
645 during vocalization is still debated (Simonyan, 2014; Belyk and Brown, 2017). Quantifications

646 of cortical microstructure, such as myelin content, indicates that the ventral larynx region is  
647 not located in primary motor cortex (Eichert et al., 2020a). The focus of the current study,  
648 however, is not the interpretation of the functional activation peaks *per se* but the relationship  
649 between their location and the underlying morphology. The individual variability in the cortical  
650 location of the ventral larynx area could be one factor in explaining inconsistent reports in the  
651 literature.

652

653

#### 654 *Relationship between Variability in Structure and Function*

655

656 Cross-subject registration based on anatomical features decreased the spatial variability of the  
657 functional peaks, indicating that anatomical variability explains some functional variability. The  
658 somatomotor system, however, is only one example system, where a link between sulcal  
659 morphology and function at the individual subject level was established (Boling et al., 1999;  
660 Coulon et al., 2011; Zlatkina et al., 2016; Germann et al., 2019). Detailed anatomical and  
661 functional studies have also revealed these relationships for other parts of the cortex (Amiez  
662 et al., 2006; Bodin et al., 2018).

663

664 A registration based on individually drawn sulci showed a better registration for the left ventral  
665 larynx area, when compared to a registration based on sulcal depth and based on FreeSurfer  
666 labels, which rely on prominent and consistent landmarks, such as deep sulci. This observation  
667 demonstrates that manual identification of anatomical features is particularly important to  
668 examine spatial morphology in variable brain regions that have low gyrification. Further work



669 on structural and functional registrations may reveal a more nuanced picture of which  
670 combination of anatomical features can better predict functional activations.

671

672 In the current study, we examined gross-anatomical features of the brain surface, an approach  
673 that is directly applicable to neuronavigation and neurosurgical planning. Recent advances in  
674 neuroimaging, however, allow us to acquire multiple image modalities in the same subjects,  
675 some of which correlate with the underlying cellular microstructure (Fischl and Dale, 2000;  
676 Zhang et al., 2012; Weiskopf et al., 2013). Although the histological analysis of post-mortem  
677 brains remains the gold standard to define anatomical parcels of the brain, neuroimaging has  
678 become a versatile tool for parcellating the cortex and to establish relationships between  
679 different modalities (Glasser et al., 2016; Jakobsen et al., 2018; Smith et al., 2019; Eichert et  
680 al., 2020b). Future work will show how detailed morphological labelling and segmentation  
681 studies can benefit from other neuroimaging modalities.

682

683 In summary, the current study demonstrated a robust relationship between morphological  
684 features of the central and subcentral sulcal segments and movement of different effectors at  
685 the individual subject level. We described the morphological patterns of the sulci in the  
686 subcentral and central opercular cortical region and their inter-individual variability. Laryngeal  
687 activity during vocalization activates the subcentral region, which we found to be highly  
688 variable across participants. This variability could explain inconsistencies in previous reports  
689 about a ventral larynx area.

690

691

692

693 **Extended Data**

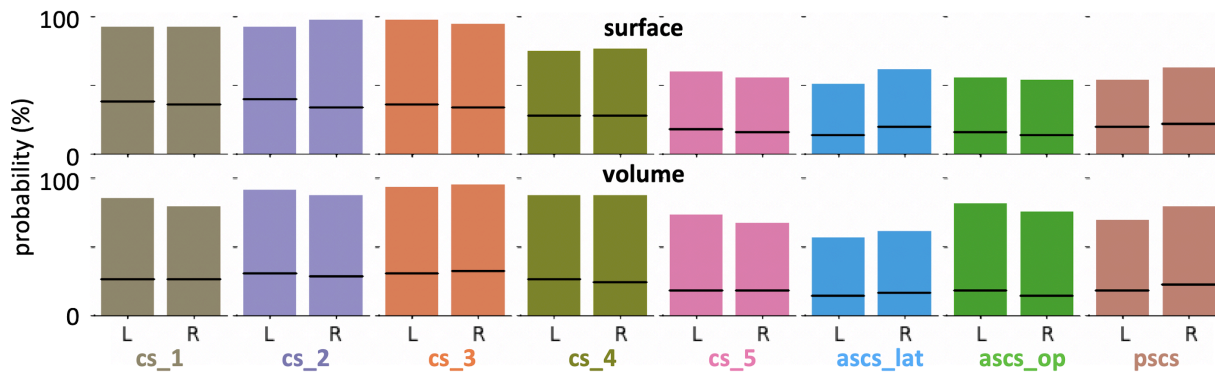

694

695 Figure 4-1: Quantification of probability maps. Bars show the maximal probability of overlap for sulcal

696 labels in surface and volume space in the left (L) and right (R) hemisphere. Horizontal black lines indicate

697 the median value of the probability map.

698

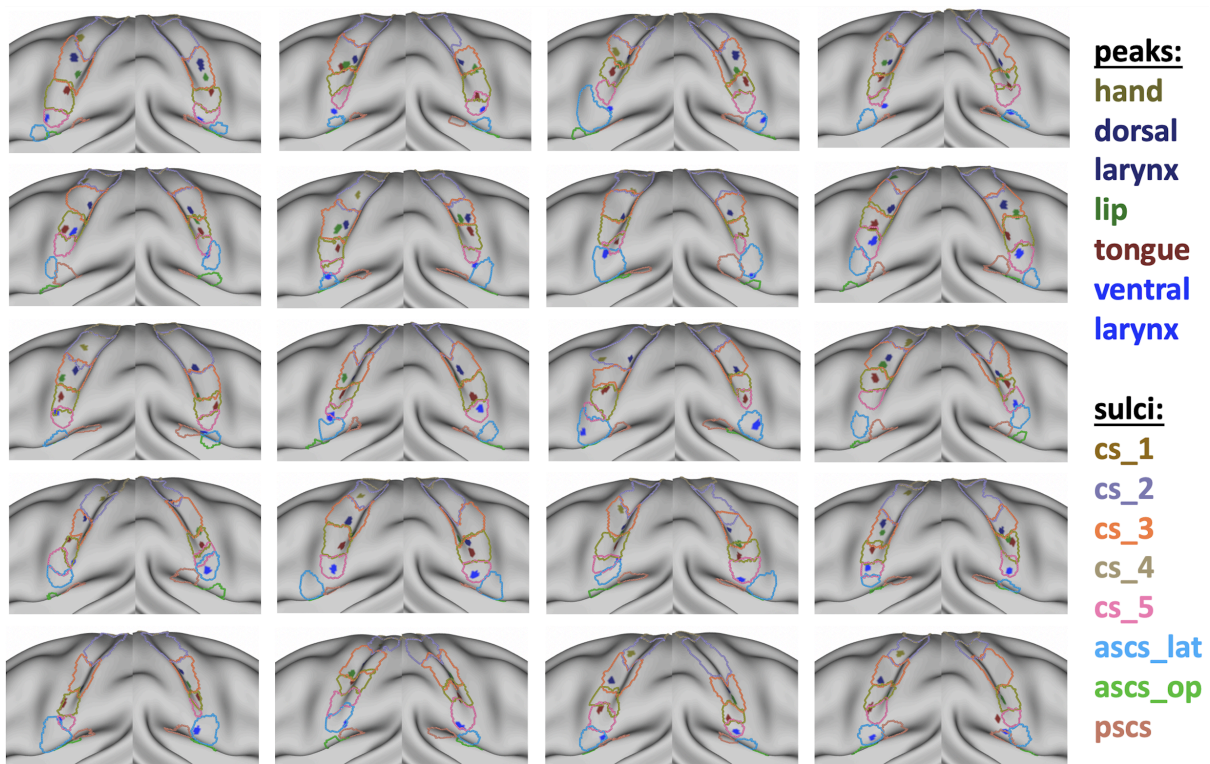

699

700 Figure 6-1: Individual sulcal labels and activation maxima. Data from the subset of subjects, where both

701 anatomical and functional data were available.

702

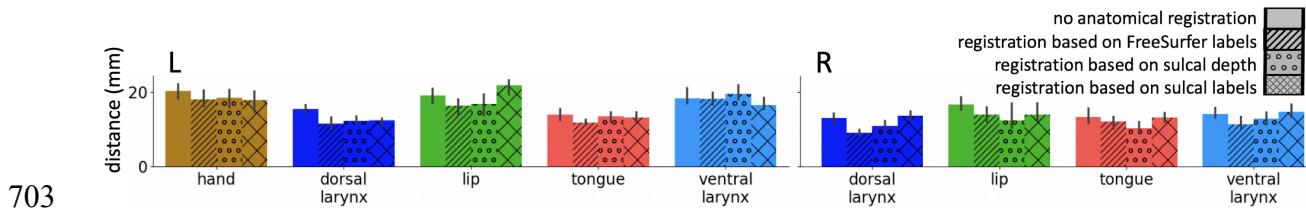

704 Figure 6-2: Effect of anatomical registrations on functional variability. Distance of task activation peaks  
705 prior to any anatomical registration (blank bars), after registration based on FreeSurfer labels  
706 (precentral gyrus, central sulcus, postcentral gyrus, subcentral gyrus/sulcus) (striped bars), after  
707 registration based on sulcal depth (dotted bars) and after registration based on manually drawn sulcal  
708 labels (crossed bars). The median distance  $\pm$  95% confidence interval is shown across all peaks for each  
709 task cluster ( $n = 20$ , 190 pairs of points for each cluster).

710

711

## 712 Author Contributions

713 Conception and design: NE, MP. Acquisition of data: NE, KEW. Analysis and interpretation of  
714 data: NE, KEW, RBM, MP. Original draft: NE, MP. Revising the article: NE, KEW, RBM, MP.  
715 Contribution of analytic tools: NE, RBM.

716

717

## 718 Data Accessibility

719 Upon acceptance of the manuscript, all derived data supporting the findings of this study will  
720 be made available from the Wellcome Centre for Integrative Neuroimaging's GitLab at  
721 [git.fmrib.ox.ac.uk/neichert/project\\_variability](https://git.fmrib.ox.ac.uk/neichert/project_variability). Anatomical raw data of the subjects that  
722 provided structural and functional data is publicly available at OpenNeuro under the accession  
723 code ds002634 (version 1.0.1). The minimally pre-processed data of the HCP subjects is openly  
724 available for download at <https://db.humanconnectome.org>.

725

726

## 727 Code and Software Accessibility

728

729 Upon acceptance of the manuscript, all processing code will be made available from the  
730 Wellcome Centre for Integrative Neuroimaging's GitLab at  
731 [git.fmrib.ox.ac.uk/neichert/project\\_variability](https://git.fmrib.ox.ac.uk/neichert/project_variability). FSL tools, including MSM, are available from  
732 [fsl.fmrib.ox.ac.uk](https://fsl.fmrib.ox.ac.uk). Connectome Workbench is available at  
733 [www.humanconnectome.org/software/connectome-workbench.html](https://www.humanconnectome.org/software/connectome-workbench.html).

734

## 735 References

736

737 Amiez C, Kostopoulos P, Champod AS, Petrides M (2006) Local morphology predicts functional  
738 organization of the dorsal premotor region in the human brain. *Journal of Neuroscience*  
739 26:2724–2731.

740 Amiez C, Neveu R, Warrot D, Petrides M, Knoblauch K, Procyk E (2013) The location of  
741 feedback-related activity in the midcingulate cortex is predicted by local morphology.  
742 *Journal of Neuroscience* 33:2217–2228.

743 Andersson JLR, Jenkinson M, Smith SM (2007) Non-linear optimisation FMRIB technical report  
744 TR07JA1.

745 Barch DM et al. (2013) Function in the human connectome: Task-fMRI and individual  
746 differences in behavior. *NeuroImage* 80:169–189.

747 Belyk M, Brown S (2017) The origins of the vocal brain in humans. *Neuroscience and*  
748 *Biobehavioral Reviews* 77:177–193.

749 Bennett CM, Miller MB (2010) How reliable are the results from functional magnetic resonance  
750 imaging? *Annals of the New York Academy of Sciences* 1191:133–155.

751 Bodin C, Takerkart S, Belin P, Coulon O (2018) Anatomic-functional correspondence in the  
752 superior temporal sulcus. *Brain Structure and Function* 223:221–232.

753 Boling W, Olivier A, Bittar RG, Reutens D (1999) Localization of hand motor activation in Broca's  
754 pli de passage moyen. *Journal of Neurosurgery* 91:903–910.

755 Bouchard KE, Mesgarani N, Johnson K, Chang EF (2013) Functional organization of human  
756 sensorimotor cortex for speech articulation. *Nature* 495:327–332.

757 Broca P (1861) Remarques sur le siège de la faculté du langage articulé suivies d'une  
758 observation d'aphémie. *Bull Soc Anthropol* 6:330–357.

- 759 Carey D, Krishnan S, Callaghan MF, Sereno MI, Dick F (2017) Functional and quantitative MRI  
760 mapping of somatomotor representations of human supralaryngeal vocal tract. *Cerebral*  
761 *Cortex* 27:265–278.
- 762 Casey BJ et al. (2018) The Adolescent Brain Cognitive Development (ABCD) study: Imaging  
763 acquisition across 21 sites. *Developmental Cognitive Neuroscience* 32:43–54.
- 764 Clouchoux C, Coulon O, Anton JL, Mangin JF, Régis J (2006) A new cortical surface parcellation  
765 model and its automatic implementation. In: *Lecture Notes in Computer Science*  
766 (including subseries *Lecture Notes in Artificial Intelligence* and *Lecture Notes in*  
767 *Bioinformatics*), pp 193–200. Springer, Berlin, Heidelberg.
- 768 Coulon O, Pizzagalli F, Operto G, Auzias G, Delon-Martin C, Dojat M (2011) Two new stable  
769 anatomical landmarks on the Central Sulcus: Definition, automatic detection, and their  
770 relationship with primary motor functions of the hand. In: *Proceedings of the Annual*  
771 *International Conference of the IEEE Engineering in Medicine and Biology Society, EMBS,*  
772 pp 7795–7798. IEEE.
- 773 Croxson PL, Forkel SJ, Cerliani L, Thiebaut De Schotten M (2018) Structural variability across  
774 the primate brain: A cross-species comparison. *Cerebral Cortex* 28:3829–3841.
- 775 Derrfuss J, Vogt VL, Fiebach CJ, Von Cramon DY, Tittgemeyer M (2012) Functional organization  
776 of the left inferior precentral sulcus: Dissociating the inferior frontal eye field and the  
777 inferior frontal junction. *NeuroImage* 59:3829–3837.
- 778 Dorsaint-Pierre R, Penhune VB, Watkins KE, Neelin P, Lerch JP, Bouffard M, Zatorre RJ (2006)  
779 Asymmetries of the planum temporale and Heschl’s gyrus: Relationship to language  
780 lateralization. *Brain* 129:1164–1176.
- 781 Eichert N, Papp D, Mars RB, Watkins KE (2020a) Mapping human laryngeal motor cortex during  
782 vocalization. *bioRxiv:2020.02.20.958314*.

- 783 Eichert N, Robinson EC, Bryant KL, Jbabdi S, Jenkinson M, Li L, Krug K, Watkins KE, Mars RB  
784 (2020b) Cross-species cortical alignment identifies different types of neuroanatomical  
785 reorganization in higher primates. bioRxiv (<https://doi.org/10.1101/645234>).
- 786 Fischl B, Dale AM (2000) Measuring the thickness of the human cerebral cortex from magnetic  
787 resonance images. *Proceedings of the National Academy of Sciences of the United States*  
788 *of America* 97:11050–11055.
- 789 Fischl B, Sereno MI, Tootell RBH, Dale AM (1999) High-resolution intersubject averaging and a  
790 coordinate system for the cortical surface. *Human Brain Mapping* 8:272–284.
- 791 Fonov V, Evans AC, Botteron K, Almli CR, McKinstry RC, Collins DL (2011) Unbiased average age-  
792 appropriate atlases for pediatric studies. *NeuroImage* 54:313–327.
- 793 Foundas AL, Leonard CM, Gilmore RL, Fennell EB, Heilman KM (1996) Pars triangularis  
794 asymmetry and language dominance. *Proceedings of the National Academy of Sciences*  
795 *of the United States of America* 93:719–722.
- 796 Germann J, Chakravarty MM, Collins LD, Petrides M (2019) Tight coupling between  
797 morphological features of the central sulcus and somatomotor body representations: A  
798 combined anatomical and functional MRI study. *Cerebral Cortex*.
- 799 Germann J, Robbins S, Halsband U, Petrides M (2005) Precentral sulcal complex of the human  
800 brain: Morphology and statistical probability maps. *Journal of Comparative Neurology*  
801 493:334–356.
- 802 Glasser MF, Smith SM, Marcus DS, Andersson JLR, Auerbach EJ, Behrens TEJ, Coalson TS, Harms  
803 MP, Jenkinson M, Moeller S, Robinson EC, Sotiropoulos SN, Xu J, Yacoub E, Ugurbil K, Van  
804 Essen DC (2016) The Human Connectome Project’s neuroimaging approach. *Nature*  
805 *Neuroscience* 19:1175–1187.
- 806 Glasser MF, Sotiropoulos SN, Wilson JA, Coalson TS, Fischl B, Andersson JL, Xu J, Jbabdi S,

- 807 Webster M, Polimeni JR, Van Essen DC, Jenkinson M (2013) The minimal preprocessing  
808 pipelines for the Human Connectome Project. *NeuroImage* 80:105–124.
- 809 Grabski K, Lamalle L, Vilain C, Schwartz JL, Vallée N, Tropres I, Baciú M, Le Bas JF, Sato M (2012)  
810 Functional MRI assessment of orofacial articulators: Neural correlates of lip, jaw, larynx,  
811 and tongue movements. *Human Brain Mapping* 33:2306–2321.
- 812 Hickok G, Lawrence Small S, Hillert DG (2016) *Neurobiology of Language*. Igarss 2014:1188.
- 813 Hitzig E, Fritsch GT (1870) Über die elektrische Erregbarkeit des Grosshirns. *Arch Anat*  
814 *Physiol*:300–332.
- 815 Jackson J. (1863) Convulsive spasms of the right hand and arm preceding epileptic seizures.
- 816 Jakobsen E, Liem F, Klados MA, Bayrak Ş, Petrides M, Margulies DS (2018) Automated  
817 individual-level parcellation of Broca’s region based on functional connectivity.  
818 *NeuroImage* 170:41–53.
- 819 Jarvis ED (2019) Evolution of vocal learning and spoken language. *Science* 366:50–54.
- 820 Jenkinson M (2003) Fast, automated, N-dimensional phase-unwrapping algorithm. *Magnetic*  
821 *Resonance in Medicine* 49:193–197.
- 822 Jenkinson M, Bannister P, Brady M, Smith S (2002) Improved optimization for the robust and  
823 accurate linear registration and motion correction of brain images. *NeuroImage* 17:825–  
824 841.
- 825 Jenkinson M, Smith S (2001) A global optimisation method for robust affine registration of  
826 brain images. *Medical Image Analysis* 5:143–156.
- 827 Josse G, Tzourio-Mazoyer N (2004) Hemispheric specialization for language. *Brain Research*  
828 *Reviews* 44:1–12.
- 829 Klein A, Ghosh SS, Avants B, Yeo BTT, Fischl B, Ardekani B, Gee JC, Mann JJ, Parsey R V. (2010)  
830 Evaluation of volume-based and surface-based brain image registration methods.



831           NeuroImage 51:214–220.

832   Miller MB, Van Horn JD, Wolford GL, Handy TC, Valsangkar-smyth M, Inati S, Grafton S,  
833           Gazzaniga MS (2002) Extensive individual differences in brain activations associated with  
834           episodic retrieval are reliable over time. *Journal of Cognitive Neuroscience* 14:1200–1214.

835   Nieto-Castañón A, Fedorenko E (2012) Subject-specific functional localizers increase sensitivity  
836           and functional resolution of multi-subject analyses. *NeuroImage* 63:1646–1669.

837   Olthoff A, Baudewig J, Kruse E, Dechent P (2008) Cortical Sensorimotor Control in Vocalization:  
838           A Functional Magnetic Resonance Imaging Study. *The Laryngoscope* 118:2091–2096.

839   Penfield W, Boldrey E (1937) Somatic motor and sensory representation in the cerebral cortex  
840           of man as studied by electrical stimulation. *Brain* 60:389–443.

841   Petrides M (2012) The human cerebral cortex. An MRI atlas of the sulci and gyri in MNI  
842           stereotaxic space. :168.

843   Petrides M (2019) Atlas of the morphology of the human cerebral cortex on the average MNI  
844           brain. New York: Academic Press.

845   Price CJ (2000) The anatomy of language: Contributions from functional neuroimaging. *Journal*  
846           of Anatomy 197:335–359.

847   Ribas GC (2010) The cerebral sulci and gyri. *Neurosurgical Focus* 28.

848   Robinson EC, Jbabdi S, Glasser MF, Andersson J, Burgess GC, Harms MP, Smith SM, Van Essen  
849           DC, Jenkinson M (2014) MSM: A new flexible framework for multimodal surface matching.  
850           *NeuroImage* 100:414–426.

851   Simonyan K (2014) The laryngeal motor cortex: Its organization and connectivity. *Current*  
852           Opinion in Neurobiology 28:15–21.

853   Smith S, Duff E, Groves A, Nichols TE, Jbabdi S, Westlye LT, Tamnes CK, Engvig A, Walhovd KB,  
854           Fjell AM, Johansen-Berg H, Douaud G (2019) Structural variability in the human brain

- 855 reflects fine-grained functional architecture at the population level. *The Journal of*  
856 *Neuroscience* 39:6136–6149.
- 857 Sprung-Much T, Petrides M (2018) Morphological patterns and spatial probability maps of two  
858 defining sulci of the posterior ventrolateral frontal cortex of the human brain: the sulcus  
859 diagonalis and the anterior ascending ramus of the lateral fissure. *Brain Structure and*  
860 *Function* 23:4125–4152.
- 861 Sprung-Much T, Petrides M (2019) Morphology and spatial probability maps of the horizontal  
862 ascending ramus of the lateral fissure. *Cerebral Cortex* 00:1–17.
- 863 Takerkart S, Auzias G, Brun L, Coulon O (2015) Mapping cortical shape differences using a  
864 searchlight approach based on classification of sulcal pit graphs. In: *Proceedings -*  
865 *International Symposium on Biomedical Imaging*, pp 1514–1517. IEEE.
- 866 Uğurbil K et al. (2013) Pushing spatial and temporal resolution for functional and diffusion MRI  
867 in the Human Connectome Project. *NeuroImage* 80:80–104.
- 868 Van Essen DC, Smith SM, Barch DM, Behrens TEJ, Yacoub E, Ugurbil K (2013) The WU-Minn  
869 Human Connectome Project: An overview. *NeuroImage* 80:62–79.
- 870 Vigneau M, Beaucousin V, Hervé PY, Duffau H, Crivello F, Houdé O, Mazoyer B, Tzourio-  
871 Mazoyer N (2006) Meta-analyzing left hemisphere language areas: Phonology, semantics,  
872 and sentence processing. *NeuroImage* 30:1414–1432.
- 873 Vogt C, Vogt O (1919) Allgemeinere Ergebnisse unserer Hirnforschung. *Journal für Psychologie*  
874 *und Neurologie*.
- 875 Weiskopf N, Suckling J, Williams G, Correia M. MM, Inkster B, Tait R, Ooi C, Bullmore T. ET, Lutti  
876 A (2013) Quantitative multi-parameter mapping of R1, PD\*, MT, and R2\* at 3T: A multi-  
877 center validation. *Frontiers in Neuroscience* 7:95.
- 878 Woo CW, Krishnan A, Wager TD (2014) Cluster-extent based thresholding in fMRI analyses:

- 879 Pitfalls and recommendations. *NeuroImage* 91:412–419.
- 880 Woolrich MW, Ripley BD, Brady M, Smith SM (2001) Temporal autocorrelation in univariate  
881 linear modeling of fMRI data. *NeuroImage* 14:1370–1386.
- 882 Yousry TA, U.D. Schmid HA, Schmidt D, Peraud A, Buettner A, Winkler P (1997) Localization of  
883 the motor hand area to a knob on the precentral gyrus. *Brain* 120:141–157.
- 884 Zhang H, Schneider T, Wheeler-Kingshott CA, Alexander DC (2012) NODDI: Practical in vivo  
885 neurite orientation dispersion and density imaging of the human brain. *NeuroImage*  
886 61:1000–1016.
- 887 Zlatkina V, Amiez C, Petrides M (2016) The postcentral sulcal complex and the transverse  
888 postcentral sulcus and their relation to sensorimotor functional organization. *European*  
889 *Journal of Neuroscience* 43:1268–1283.
- 890 Zlatkina V, Petrides M (2010) Morphological patterns of the postcentral sulcus in the human  
891 brain. *Journal of Comparative Neurology* 518:3701–3724.
- 892
